# Supplementary material
Source: PubMed Central journal article supplement (PMC1345670)

Arf1

MHCI

WT

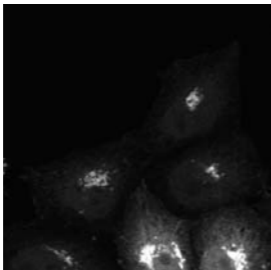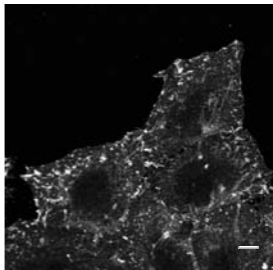

N52R

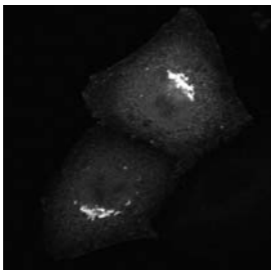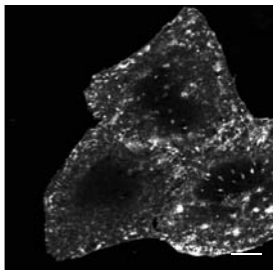

Supplement: mbc_E05-06-0523_1.pdf [file mbc_E05-06-0523_1.pdf]

A

Arf6

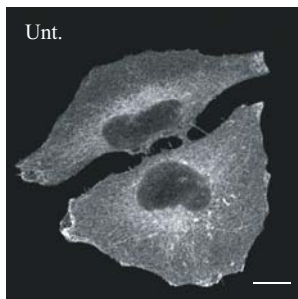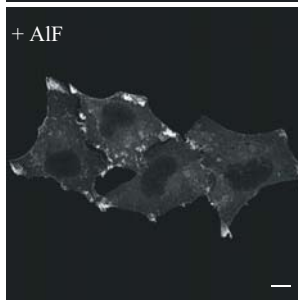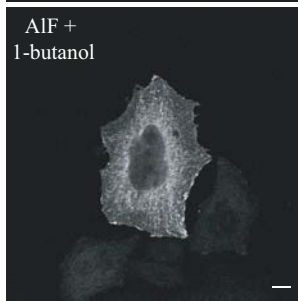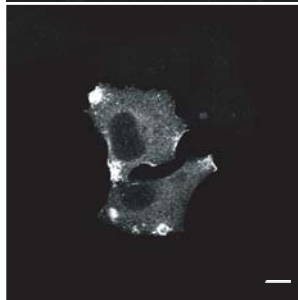

Arf6 N48R

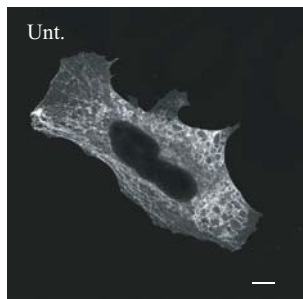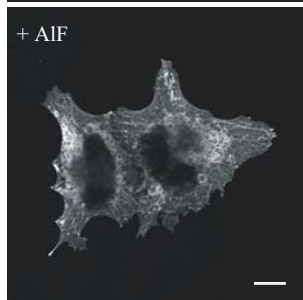

B

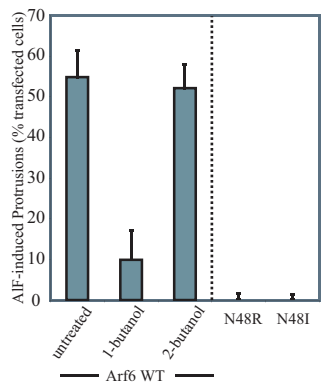

Supplement: mbc_E05-06-0523_2.pdf [file mbc_E05-06-0523_2.pdf]
